# Supplementary material
Source: publisher figshare collection journal article supplement (https://asha.figshare.com/articles/dataset/_/14462256)
Supplement: Supplementary file 1 [file 1]

## **Supplemental Material S1.** Electronic search strategies.

### **MEDLINE (OVID). April 27, 2018.**

- 1 - alternative.mp.
- 2 - augmentative.mp.
- 3- 1 or 2
- 4 - communication\*.mp.
- 5 - language\*.mp.
- 6 - 4 or 5
- 7 - 3 and 6
- 8 - AAC.mp.
- 9 - (augmentative and alternative communication).mp. [mp=title, abstract, original title, name of substance word, subject heading word, keyword heading word, protocol supplementary concept word, rare disease supplementary concept word, unique identifier, synonyms]
- 10 - Communication Aids for Disabled/
- 11 - 8 or 9 or 10
- 12 - model\*.mp.
- 13 - intervention\*.mp.
- 14 - program\*.mp.
- 15 - practice\*.mp.
- 16 - 12 or 13 or 14 or 15
- 17 - child\*.mp.
- 18 - kid\*.mp.
- 19 - infant\*.mp.
- 20 - minor\*.mp.
- 21 - toddler\*.mp.
- 22 - teen\*.mp.
- 23 - adolescent\*.mp.
- 24 - young\*.mp.
- 25 - 17 or 18 or 19 or 20 or 21 or 22 or 23 or 24

26 - 11 and 16 and 25

27 - limit 26 to yr="2000 - 2018"

**ERIC (ProQuest). April 26, 2018**

S1 - ab(alternative) OR ab(augmentative)

S2 - ab(communication\*) OR ab(language\*)

S3 - S1 AND S2

S4 - ab(AAC) OR ab(alternative AND augmentative communication)

S5 - S3 OR S4

S6 - ab(model\*) OR ab(intervention\*) OR ab(program\*) OR ab(practice\*)

S7 - ab(child\*) OR ab(kid\*) OR ab(infant\*) OR ab(minor\*) OR ab(toddler\*) OR ab(teen\*)  
OR ab(adolescent\*) OR ab(young\*)

S8 - S5 AND S6 AND S7

S9 - (S5 AND S6 AND S7) AND yr(2000-2019)

S10 - (S5 AND S6 AND S7) AND (yr(2000-2019) AND PEER(yes))

**PsycINFO (EBSCO). May 5, 2018.**

S1 - ab(alternative) OR ab(augmentative)

S2 - ab(communication\*) OR ab(language\*)

S3 - S1 AND S2

S4 - aac OR (alternative AND augmentative communication)

S5 - S3 OR S4

S6- AB model\* OR AB intervention\* OR AB program\* OR AB practice\*

S7 – AB child\* OR AB kid\* OR AB infant\* OR AB minor\* OR AB toddler\* OR AB  
teen\* OR AB adolescent\*

S8 - S5 AND S6 AND S7

**Education Database (ProQuest). April 26, 2018**

S1 - ab(alternative) OR ab(augmentative)

S2 - ab(communication\*) OR ab(language\*)

S3 - S1 AND S2

S4 - ab(AAC) OR ab(augmentative and alternative communication)

S5 - S3 OR S4

S6 - ab(model\*) OR ab(intervention\*) OR ab(program\*) OR ab(practice\*)

S7 - ab(child\*) OR ab(kid\*) OR ab(infant\*) OR ab(minor\*) OR ab(toddler\*) OR ab(teen\*)  
OR ab(adolescent\*) OR ab(young\*)

S8 - S5 AND S6 AND S7

S9 - (S5 AND S6 AND S7) AND yr(2000-2019)

S10 - (S5 AND S6 AND S7) AND (yr(2000-2019) AND PEER(yes))

S11 - (S5 AND S6 AND S7) AND (yr(2000-2019) AND PEER(yes))

**Teacher Reference Center (EBSCO). April 27, 2018.**

S1 - AB alternative OR AB augmentative

S2 - AB communication\* OR AB language\*

S3 - S1 AND S2

S4 - AB AAC OR AB ( augmentative and alternative communication )

S5 - S3 OR S4

S6 - AB model\* OR AB intervention\* OR AB program\* OR AB practice\*

S7 - AB child\* OR AB kid\* OR AB infant\* OR AB minor\* OR AB toddler\* OR AB teen\*  
OR AB adolescent\* OR AB young\*

S8 - S5 AND S6 AND S7

S9 - S5 AND S6 AND S7. Limiters - Published Date: 2000/01/01-2018/12/31; Peer Reviewed.

**SCIELO (Web of Science). April 27, 2018.**

- # 1 Tema: (alternative) OR Tema: (augmentative)
- # 2 22.788 Tema: (communication\*) OR Tema: (language\*)
- # 3 Tema: (AAC) OR Tema: (augmentative and alternative communication)
- # 4 #2 AND #1
- # 5 #4 OR #3
- # 6 Tema: (model\*) OR Tema: (intervention\*) OR Tema: (program\*) OR Tema: (practice\*)
- # 7 Tema: (child\*) OR Tema: (kid\*) OR Tema: (infant\*) OR Tema: (minor\*) OR Tema: (toddler\*) OR Tema: (teen\*) OR Tema: (adolescent\*) OR Tema: (young\*)
- # 8 #6 AND #5
- # 9 #8 AND #7
