# Supplementary material
Source: publisher figshare collection journal article supplement (https://asha.figshare.com/articles/dataset/_/14462256)
Supplement: Supplementary file 2 [file 1]

## Supplemental Material S2. Quality criteria definitions.

### Based on and complemented with:

Tate, R., McDonald, S., Perdices, M., Togher, L., Schultz, R., & Savage, S. (2008). Rating the methodological quality of single-subject designs and N-of-1 trials: Introducing the Single-Case Experimental Design (SCED) Scale. *Neuropsychological Rehabilitation*, 18(4), 385–401. <https://doi.org/10.1080/09602010802009201>

| Item                                         | Description                                                                                                                                                                                                                                                                     |
|----------------------------------------------|---------------------------------------------------------------------------------------------------------------------------------------------------------------------------------------------------------------------------------------------------------------------------------|
| <b>1. Clinical history</b>                   | The article provides a detailed description of the participants, including at least gender, age and clinical diagnosis. With the data provided it is possible to determine the characteristics that another person should have to guarantee the applicability of the treatment. |
| <b>2. Target behaviors</b>                   | The target behavior, that is what is being measured to determine the success of the treatment, and is precise, repeatable and operationally defined                                                                                                                             |
| <b>3. Design</b>                             | The relationship between the cause and effect of the study, that is, the relationship between the treatment and its clinical effect on the participant is well defined in the design of the paper                                                                               |
| <b>4. Baseline</b>                           | The baseline measure is determined. That is to say, it is established how much of the behavior occurred before the treatment period                                                                                                                                             |
| <b>5. Sampling behavior during treatment</b> | The level of behavior required in the treatment phase is established to distinguish this from response fluctuations in the baseline phase.                                                                                                                                      |
| <b>6. Raw data recording</b>                 | Sufficient and accurate raw data are provided. This raw data allows for visualizing the variability of the target behavior.                                                                                                                                                     |
| <b>7. Interrater reliability</b>             | A measure of agreement between different researchers is provided in order to determine whether the measurement of the target behavior is reliable and collected in a consistent way.                                                                                            |
| <b>8. Independence of the raters</b>         | An independent researcher, a person who was not involved in the research, was employed to reduce the assessment bias                                                                                                                                                            |
| <b>9. Statistical analysis</b>               | The effectiveness of the treatment in each phase of the study is demonstrated through statistical significance.                                                                                                                                                                 |

|                           |                                                                                                                                                             |
|---------------------------|-------------------------------------------------------------------------------------------------------------------------------------------------------------|
| <b>10. Replication</b>    | It is demonstrated by data that the application and results of the treatment can be transferred to other individuals (patients or therapists) or situations |
| <b>11. Generalization</b> | The treatment has a functional utility. That is to say, it can be extended to other fields or areas of the participant’s life.                              |
