# Supplementary material
Source: publisher figshare collection journal article supplement (https://asha.figshare.com/articles/dataset/_/14462256)
Supplement: Supplementary file 3 [file 1]

**Supplemental Material S3.** Characteristics of the interventions.

| Study                   | Study design                                                                          | Setting                                                     | Baseline/generalization/<br>maintenance | Length | Sessions/<br>week | Session<br>duration | Aided/<br>unaided | Low/<br>high<br>tech |
|-------------------------|---------------------------------------------------------------------------------------|-------------------------------------------------------------|-----------------------------------------|--------|-------------------|---------------------|-------------------|----------------------|
| Millar et al. (2004)    | Single subject multi-test across subjects                                             | School. Quiet room outside of classroom. One-to-one session | yes/yes/yes                             | no     | 2,5               | 37,5                | Aided             | High                 |
| Rudd et al. (2007)      | Pre-test, post-test                                                                   | School’s therapy room                                       | yes/yes/no                              | 6      | 2                 | 21                  | Both              | Low                  |
| Soto et al. (2007)      | AB design with follow-up phase to assess generalization                               | Special education classroom                                 | yes/yes/no                              | 6      | 3                 | 30                  | Aided             | High                 |
| Truxel & O’Keefe (2007) | Multiple-baseline across subjects                                                     | Special education public school                             | yes/yes/yes                             | no     | no                | no                  | Aided             | High                 |
| Light et al. (2008)     | Not defined. ABA                                                                      | School. One-to-one sessions                                 | yes/no/no                               | no     | 2                 | 30                  | Both              | High                 |
| Soto & Dukhovny (2008)  | Single-subject multiple test, three-phase design                                      | Public school. One-to-one lessons                           | yes/yes/yes                             | 6      | 3                 | 60                  | Both              | High                 |
| Stephenson (2009)       | ABA (4 children together)                                                             | Special education classroom. 7 students                     | yes/yes/yes                             | no     | 3                 | no                  | Aided             | High                 |
| Soto et al. (2009)      | Single-subject two phase multiple-probe design with replication across 3 participants | Elementary school                                           | yes/yes/yes                             | 24     | 2                 | 55                  | Both              | Both                 |

|                           |                                                                                                                       |                                                            |             |     |     |      |                                |                           |
|---------------------------|-----------------------------------------------------------------------------------------------------------------------|------------------------------------------------------------|-------------|-----|-----|------|--------------------------------|---------------------------|
| Choi et al.<br>(2010)     | Multi-probe across participants                                                                                       | Special education classroom at a public elementary school  | yes/yes/yes | no  | no  | no   | Aided                          | Both                      |
| Harding et al. (2011)     | Pre-test, post-test                                                                                                   | School: The settings were: lunch time, play time and music | yes/yes/no  | 5   | 5   | 60   | Both                           | Low                       |
| Van der Meer et al (2012) | Multiple-probe across participants design and SGD and MS conditions were compared in an alternating treatments design | Special education classroom. Leisure activities            | yes/yes/yes | no  | 3,5 | 5    | Both                           | High                      |
| Snodgrass et al. (2013)   | A variation of a single subject multiple baseline design across four stimuli                                          | Special education classroom. 4 students                    | yes/yes/yes | no  | no  | no   | Aided                          | Low                       |
| Edmister & Wegner (2015)  | Multiple baseline                                                                                                     | Home or/and summer daycare facility                        | yes/no/no   | no  | no  | no   | Aided                          | High                      |
| Lanter et al. (2016)      | AB design with follow-up phase to assess generalization                                                               | University speech, language and hearing clinic             | yes/yes/no  | 10  | 2   | 20   | Aided                          | Low                       |
|                           |                                                                                                                       |                                                            |             | 9,5 | 2,8 | 35,4 | Aided 9<br>Unaided 0<br>Both 5 | High 8<br>Low 4<br>Both 2 |

*Note.* MS = Makaton Sing Language; PE = picture exchange; PECS = Picture Exchange Communication System; PCS = picture communication symbols; SGD = speech generating device.
